# Supplementary material for: Design of stretchable and self-powered sensing device for portable and remote trace biomarkers detection
Source: Springer Nature journal article supplement (doi:10.1038/s41467-023-40953-z), 2023-08-26
Supplement: MOESM1 [file 41467_2023_40953_MOESM1_ESM.pdf]

## Supplementary Information

### **Design of stretchable and self-powered sensing device for portable and remote trace**

#### **biomarkers detection**

Wenxi Huang<sup>1,†</sup>, Qiongleng Ding<sup>1,†</sup>, Hao Wang<sup>1,†</sup>, Zixuan Wu<sup>1</sup>, Yibing Luo<sup>1</sup>, Wenxiong Shi<sup>2</sup>, Le Yang<sup>3</sup>, Yujie Liang<sup>4</sup>, Chuan Liu<sup>1</sup>, and Jin Wu<sup>1\*</sup>

<sup>1</sup>State Key Laboratory of Optoelectronic Materials and Technologies, Guangdong Province Key Laboratory of Display Material and Technology, School of Electronics and Information Technology, Sun Yat-sen University, Guangzhou 510275, China. <sup>2</sup>Institute for New Energy Materials and Low Carbon Technologies, School of Materials Science and Engineering, Tianjin University of Technology, Tianjin 300384, China. <sup>3</sup>Guanghua School of Stomatology, Hospital of Stomatology, Sun Yat-sen University, 56th Lingyuanxi Road, Guangzhou, Guangdong, 510055, China; Guangdong Province Key Laboratory of Stomatology, No. 74, 2nd Zhongshan Road, Guangzhou, 510080, Guangdong, China. <sup>4</sup>Department of Oral and Maxillofacial Surgery, Guanghua School of Stomatology, Hospital of Stomatology, Sun Yat-sen University, 56th Lingyuanxi Road, Guangzhou, Guangdong, 510055, China; Guangdong Province Key Laboratory of Stomatology, No. 74, 2nd Zhongshan Road, Guangzhou, 510080, Guangdong, China. \*email: [wujin8@mail.sysu.edu.cn](mailto:wujin8@mail.sysu.edu.cn)

<sup>†</sup>These authors contributed equally to this work.

## Supplementary Figures

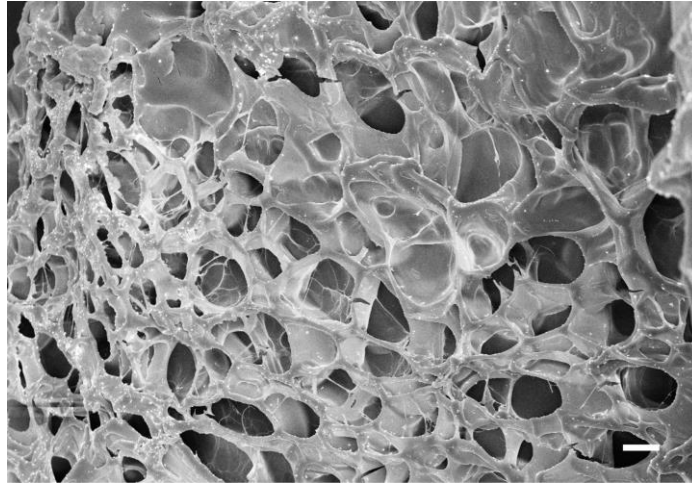

**Supplementary Figure 1. Scanning electron microscopy (SEM) image of double network (DN) hydrogel.** The scale bar is 10  $\mu\text{m}$ . The experiment was repeated 3 times independently with similar results.

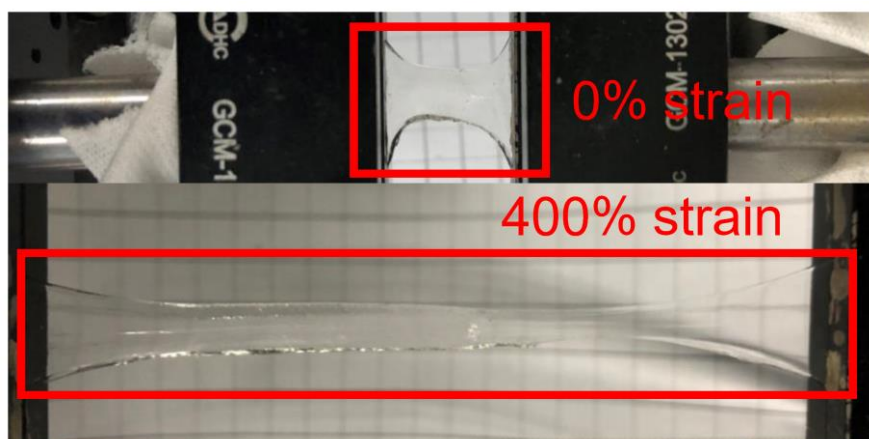

**Supplementary Figure 2. Photographs of pristine DN hydrogel (DNH) at 0% and 400% tensile strains.**

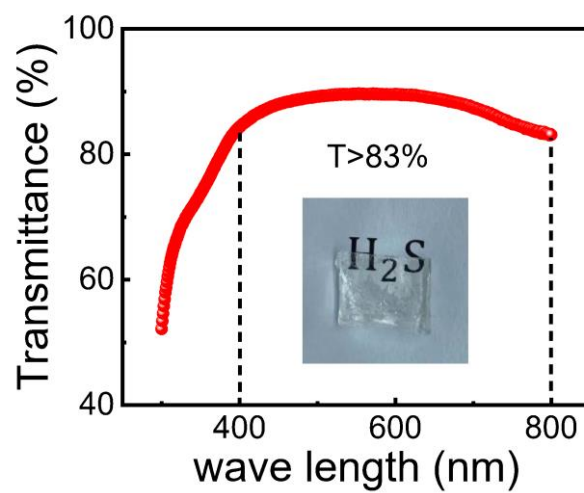

**Supplementary Figure 3. Transmittance spectra of pristine DNH.** Inset is the photograph of a piece of pristine DNH placed on a word “H<sub>2</sub>S”.

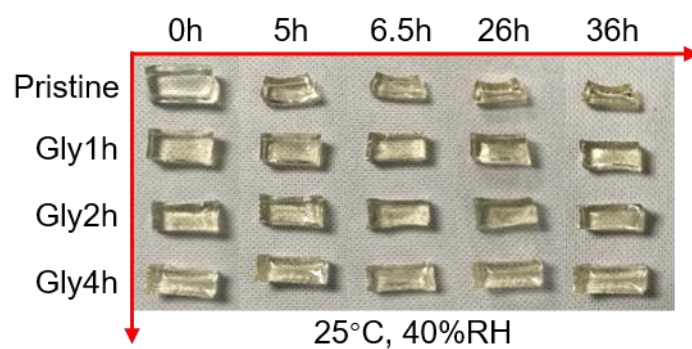

**Supplementary Figure 4. Photographs showing the morphology evolutions of pristine DNH and organohydrogels (DNOs) when stored at 25°C, 40% relative humidity (RH) for a series of time.**

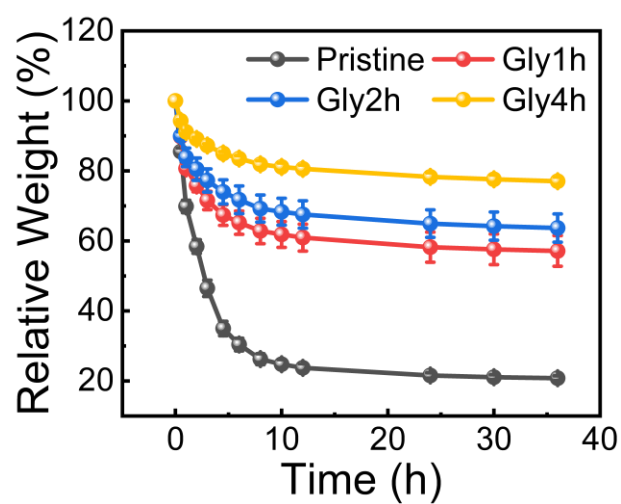

**Supplementary Figure 5. Relative weight change of pristine DNHs and DNOs when stored at 25°C, 40% RH for a series of time.** n = 3 for each group. The error bars denote standard deviations of the mean.

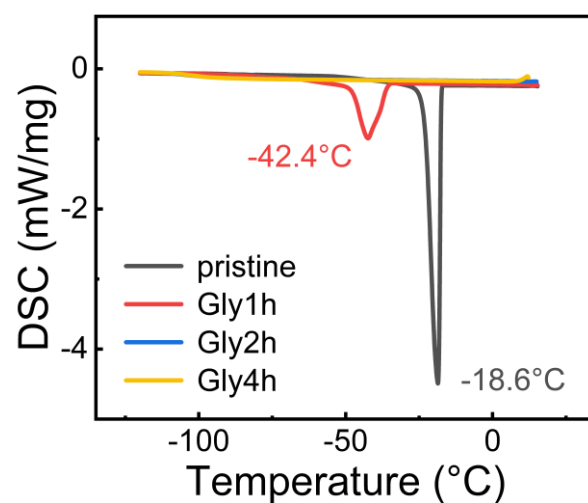

**Supplementary Figure 6. Differential scanning calorimetry (DSC) spectra of pristine DNH and DNHs obtained by soaking in glycerol (Gly) for different time.**

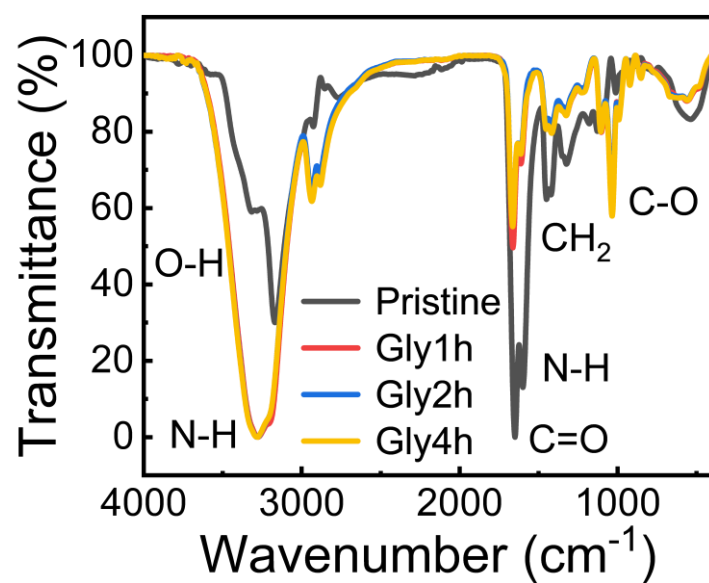

**Supplementary Figure 7. Fourier transform-infrared (FTIR) spectra of pristine DNH and DNOs obtained by soaking in Gly for different time.**



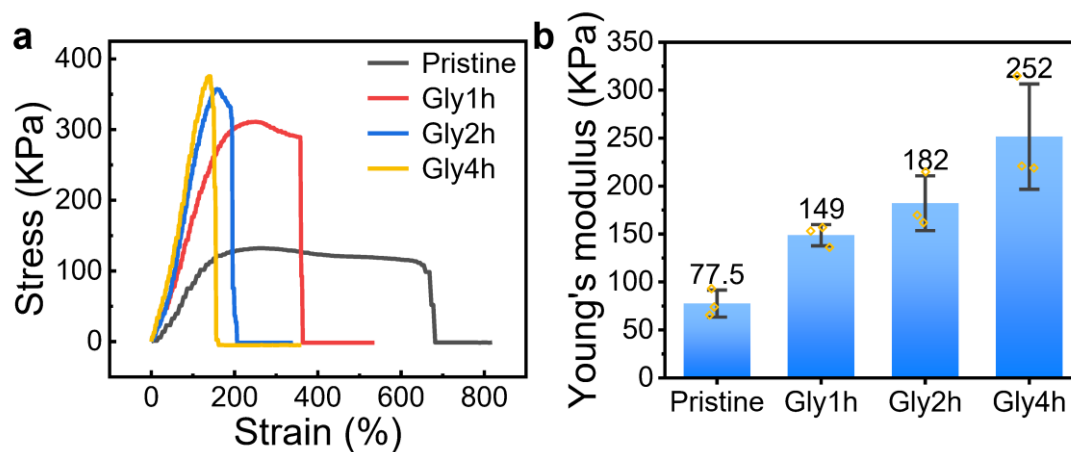

**Supplementary Figure 8. Mechanical properties of pristine DNH and DNOs obtained by soaking in Gly for different time. a** stress-strain curves; **b** Young's modulus.  $n = 3$  for each group. The error bars denote standard deviations of the mean.

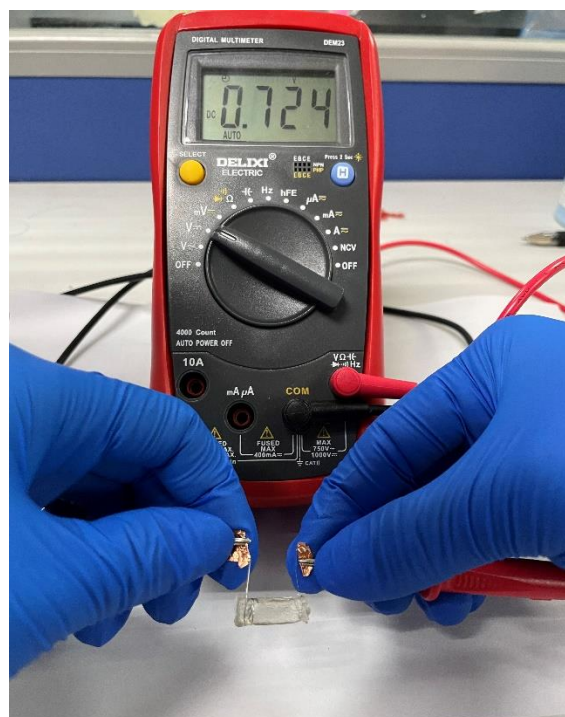

**Supplementary Figure 9. A physical picture of the self-powered sensor (Zn/Ag/DNH).**

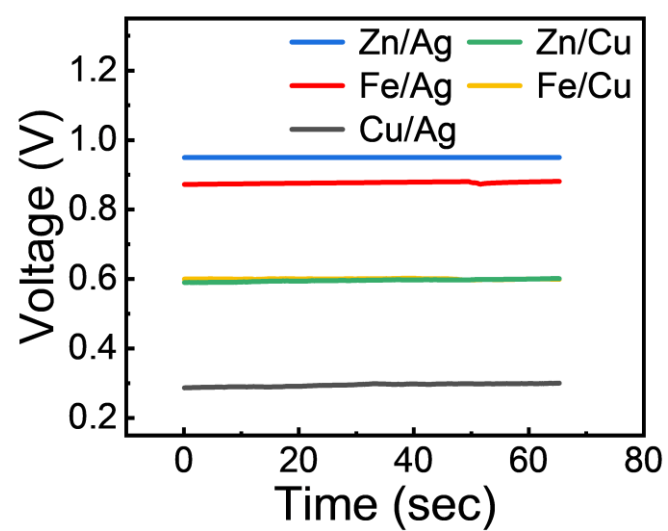

**Supplementary Figure 10. OCV of battery-sensor complexes with different metal electrodes.**

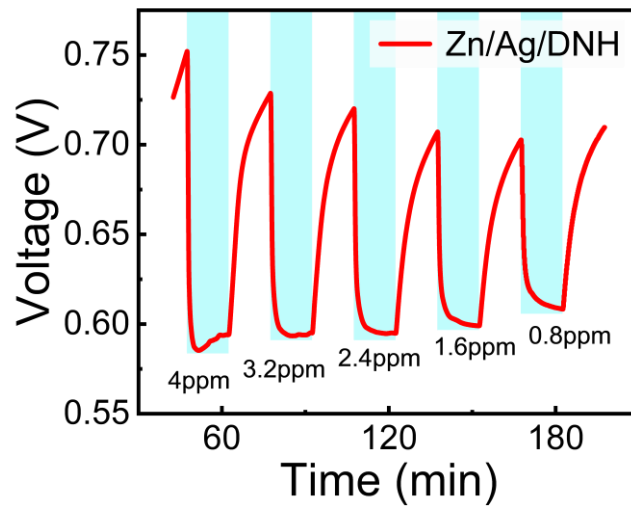

**Supplementary Figure 11. Dynamic change in the Open-circuit voltage (OCV) of the device with Zn-DNH-Ag structure to H<sub>2</sub>S gas with reduced concentration from 4 to 0.8 ppm.**

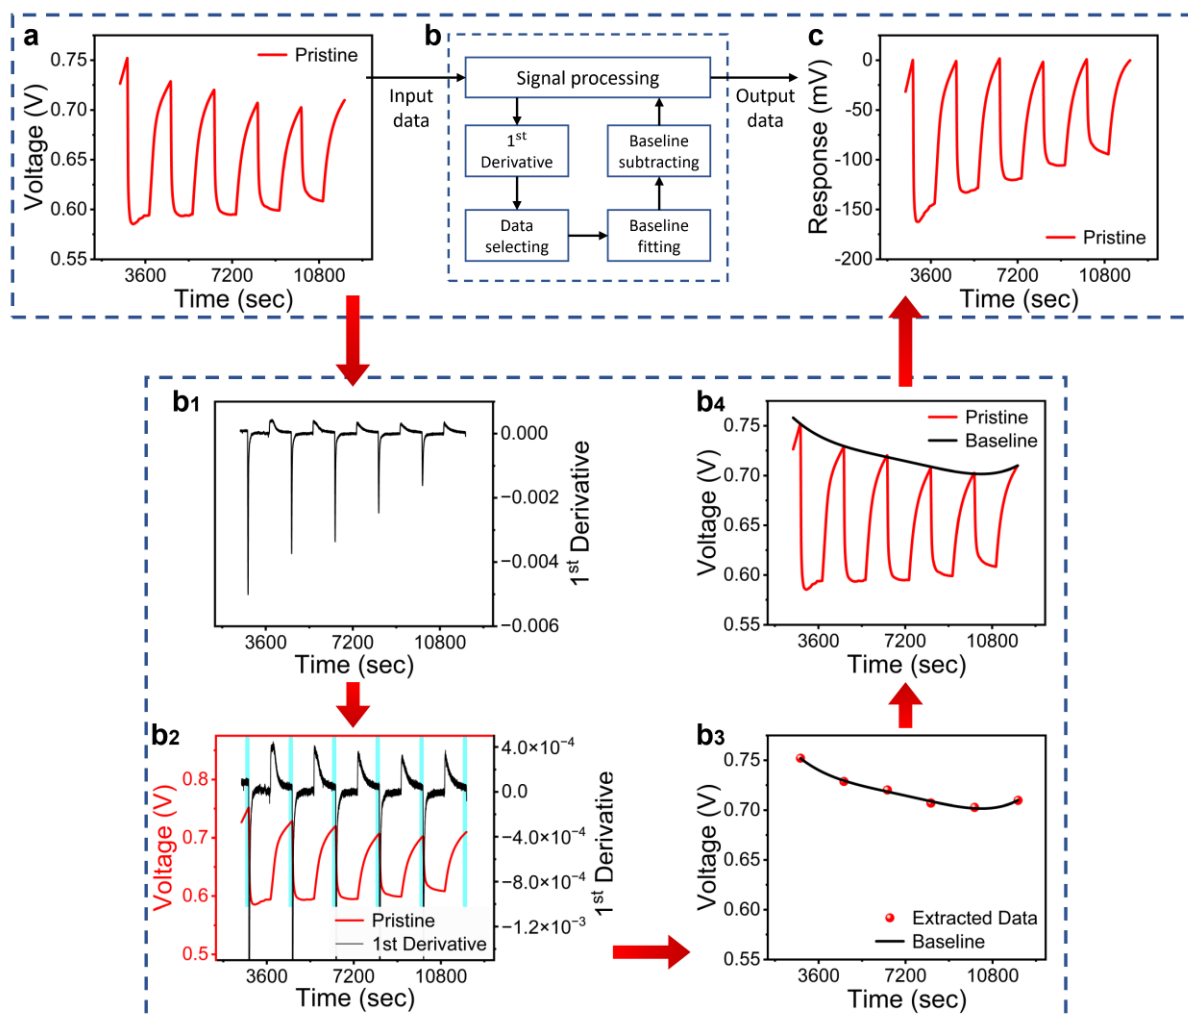

**Supplementary Figure 12. Baseline correction.** **a** The original OCV of Zn/Ag/DNH sensor to H<sub>2</sub>S before baseline correction. **b** The procedure of baseline correction: **b<sub>1</sub>** The 1<sup>st</sup> derivative curve of the voltage in **a**. **b<sub>2</sub>** The original dynamic OCV and its 1<sup>st</sup> derivative curve of Zn/Ag/DNH sensor to H<sub>2</sub>S. **b<sub>3</sub>** The extracted data and corrected baseline of dynamic OCV. **b<sub>4</sub>** The baseline correction of the dynamic OCV to H<sub>2</sub>S. **c** Corrected response curve of Zn/Ag/DNH sensor to H<sub>2</sub>S.

The process of baseline correction is as follow. Firstly, the first order derivative of the original OCV data was obtained (**b<sub>1</sub>**). Secondly, the original data points whose corresponding first derivative values were located in the recovery period and were closest to 0 were selected (marked in cyan in **b<sub>2</sub>**). Then, the extracted data were used for polynomial fitting to obtain the

baseline (**b<sub>3</sub>**). Lastly, the corrected response curve was obtained by subtracting the baseline from the original dynamic OCV (**b<sub>4</sub>**).

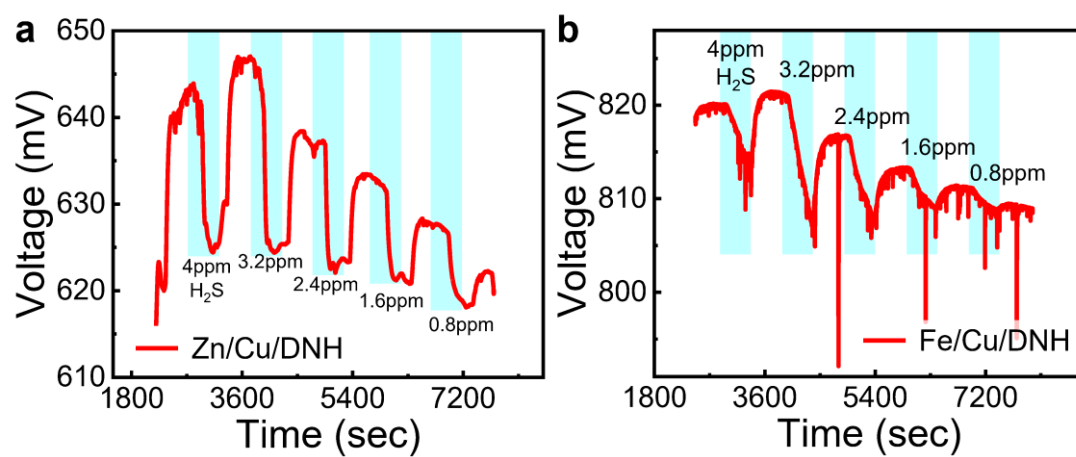

**Supplementary Figure 13. Dynamic OCV change of different sensors made of different electrode materials to  $H_2S$  gas with reduced concentration from 4 to 0.8 ppm. a Zn/Cu/DNH; b Fe/Cu/DNH.**

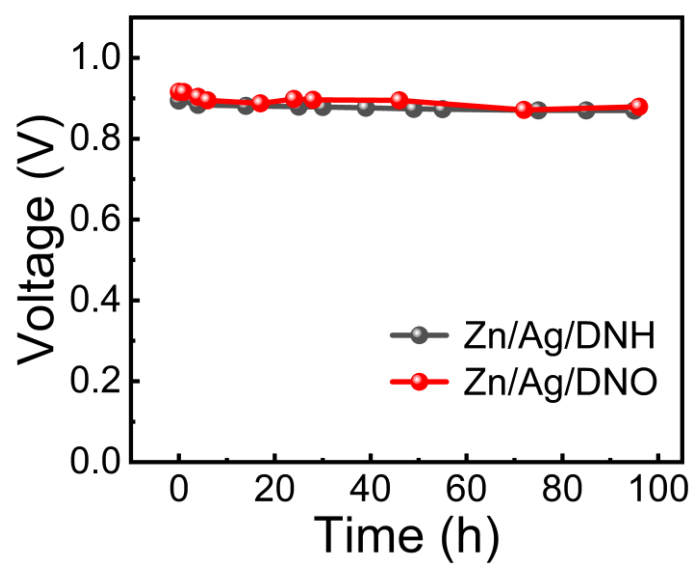

**Supplementary Figure 14. OCVs of Zn/Ag/DNH and Zn/Ag/DNO sensors were intermittently recorded over 96 h, showing the stability of the OCV.**



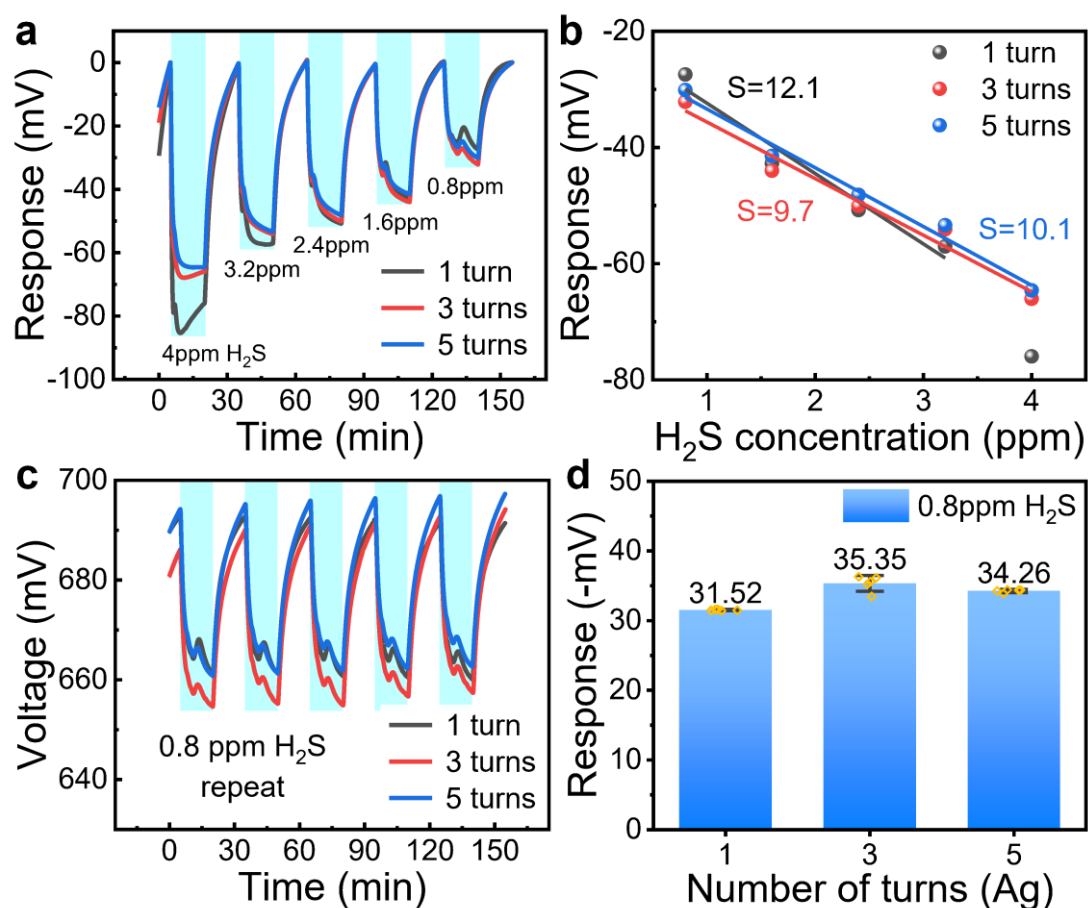

**Supplementary Figure 15.  $\text{H}_2\text{S}$  sensing properties of the Zn/Ag/DNO sensor with different numbers of Ag wire turns (diameter: 0.05 mm). a** Dynamic responses to  $\text{H}_2\text{S}$  gas with reduced concentration from 4 to 0.8 ppm after baseline corrections. **b** Sensitivity derived from data in **a**. **c** Dynamic OCV change of the sensor in cyclic tests of 0.8 ppm  $\text{H}_2\text{S}$ . **d** Response histogram extracted from **c**.  $n = 5$  for each group. The error bars denote standard deviations of the mean.

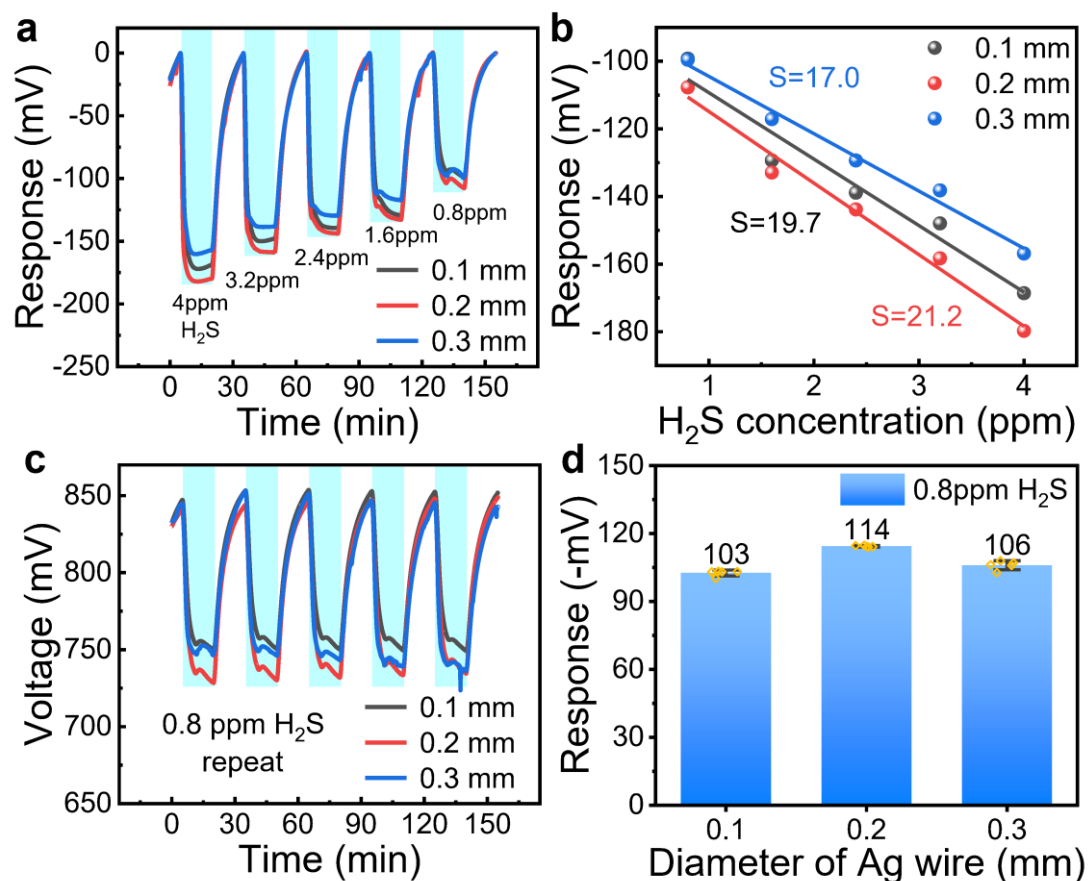

**Supplementary Figure 16.  $\text{H}_2\text{S}$  sensing properties of the Zn/Ag/DNO sensor with different diameter of Ag wire.** **a** Dynamic responses to  $\text{H}_2\text{S}$  gas with reduced concentration from 4 to 0.8 ppm after baseline corrections. **b** Sensitivity derived from data in **a**. **c** Dynamic OCV of the sensor in cyclic tests of 0.8 ppm  $\text{H}_2\text{S}$ . **d** Response histogram extracted from **c**.  $n = 5$  for each group. The error bars denote standard deviations of the mean.

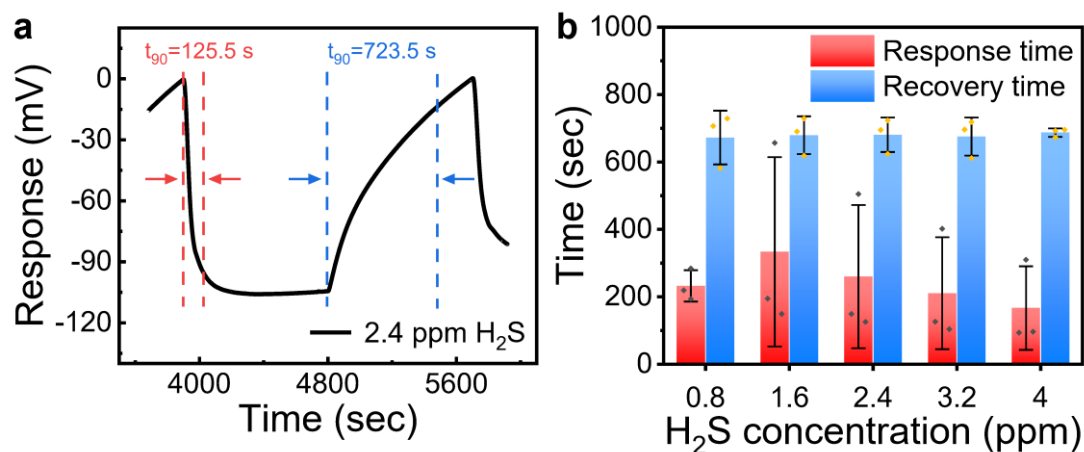

**Supplementary Figure 17. Response/recovery time of Zn/Ag/DNO sensor.** **a** Analysis of response/recovery time to 2.4 ppm  $\text{H}_2\text{S}$ . The curve is a segment extracted from Fig. 2c. **b** Response/recovery time of sensor to varying concentrations of  $\text{H}_2\text{S}$ .  $n = 3$  for each group. The error bars denote standard deviations of the mean.

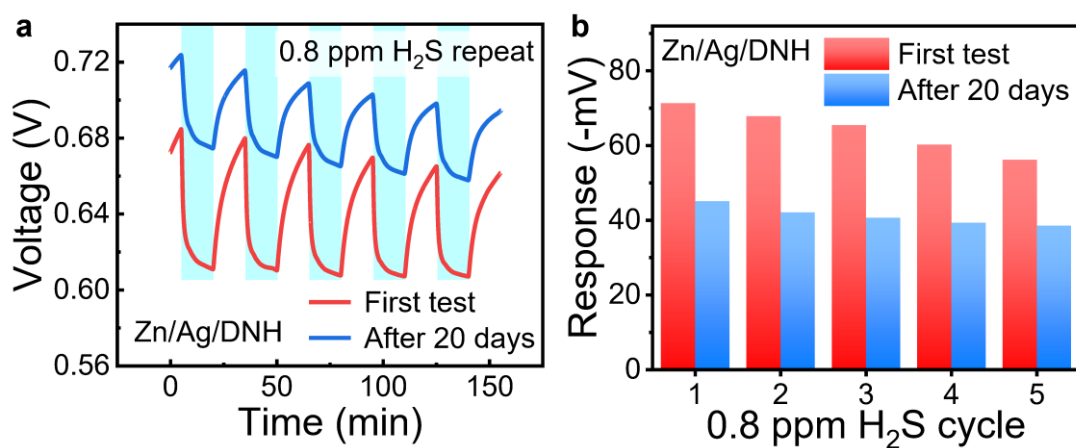

**Supplementary Figure 18. Repeatability and stability of Zn/Ag/DNH sensor.** **a** Dynamic OCV and **b** response histogram of Zn/Ag/DNH sensor to 0.8 ppm H<sub>2</sub>S cycling for the first time and after 20 days of placement.

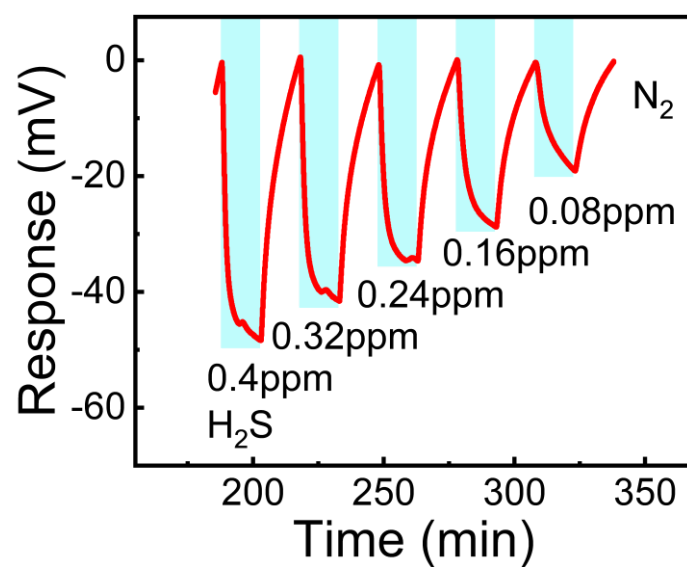

**Supplementary Figure 19. Dynamic response curves of Zn/Ag/DNO to H<sub>2</sub>S gas with relatively low concentrations (from 0.4 to 0.08 ppm).**

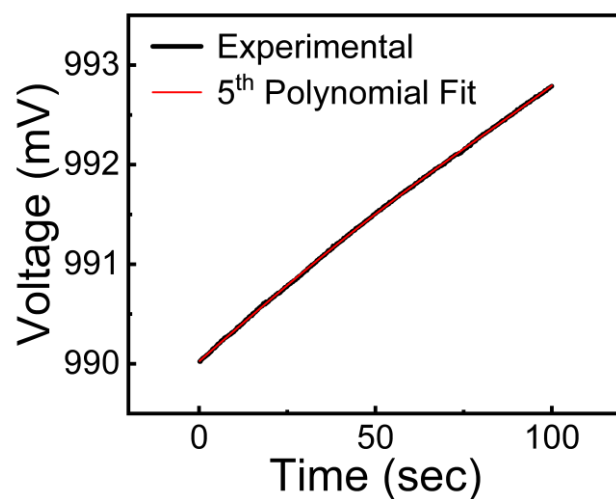

**Supplementary Figure 20. Plots of the 5<sup>th</sup> order polynomial fitting graphs of OCV of the sensor at the baseline before exposure to H<sub>2</sub>S, aiming at calculating the noise level.**

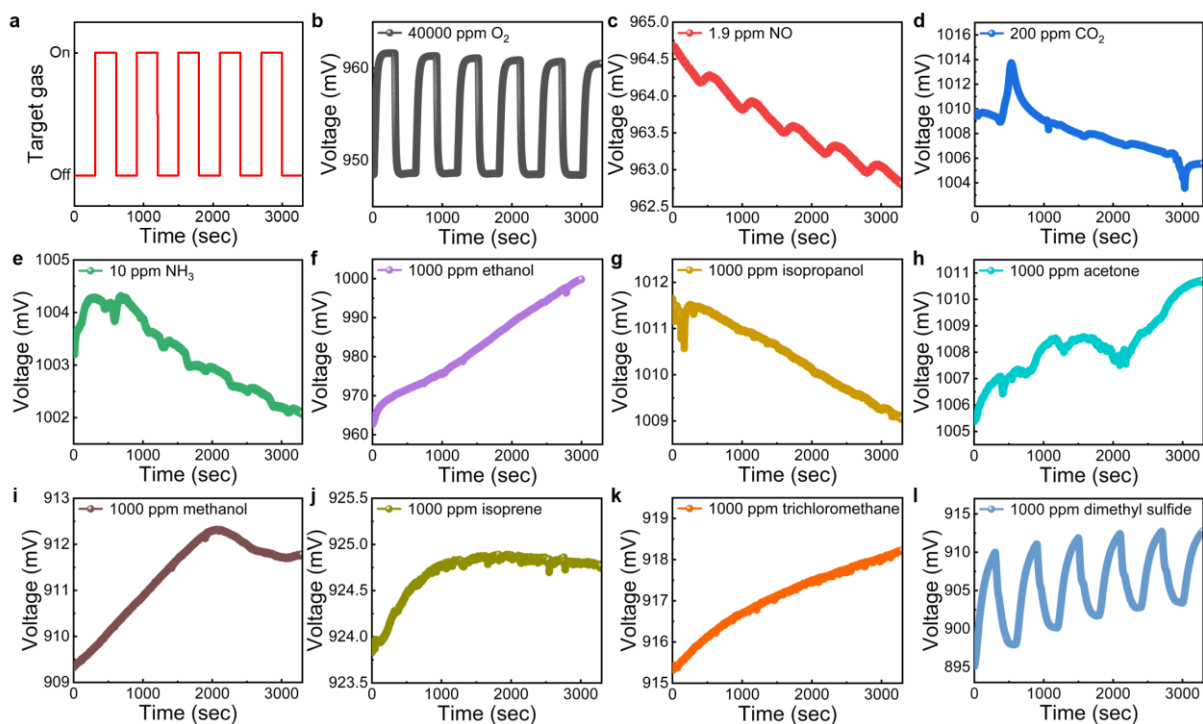

**Supplementary Figure 21. Selectivity of Zn/Ag/DNO sensor.** **a** Plot showing the process that controlled the periodic “on” and “off” of target gases to Zn/Ag/DNO sensor in (b-l). **b-l** OCV of the Zn/Ag/DNO sensor in the cyclic detection of **b** 40000 ppm O<sub>2</sub>, **c** 1.9 ppm NO, **d** 200 ppm CO<sub>2</sub>, **e** 10 ppm NH<sub>3</sub>, **f** 1000 ppm ethanol, **g** 1000 ppm isopropanol, **h** 1000 ppm acetone, **i** 1000 ppm methanol, **j** 1000 ppm isoprene, **k** 1000 ppm trichloromethane, and **l** 1000 ppm dimethyl sulfide.

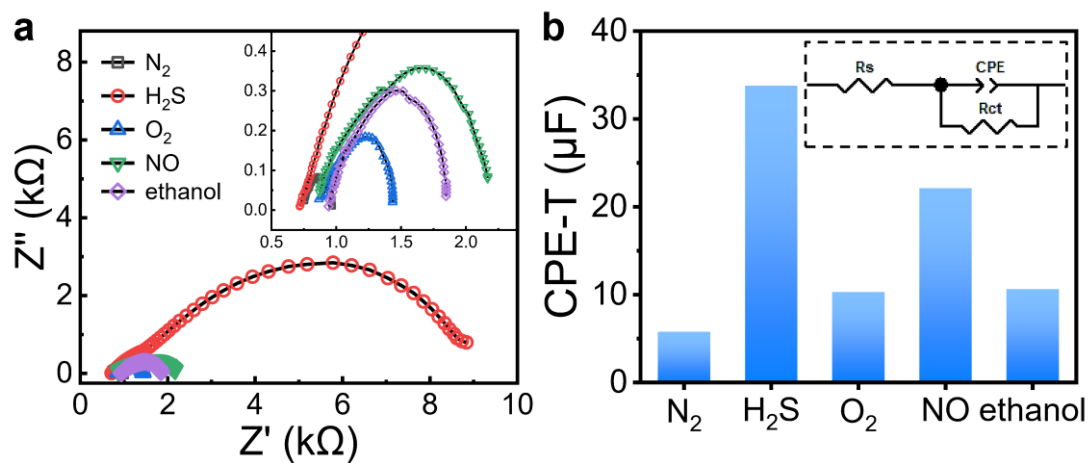

**Supplementary Figure 22. Electrochemical impedance spectroscopy (EIS) analysis of the Zn/Ag/DNO sensor under different gas atmospheres. a** Impedance spectra; **b** CPE-T values obtained by fitting. The insert is an equivalent circuit diagram of the Zn/Ag/DNO sensor.



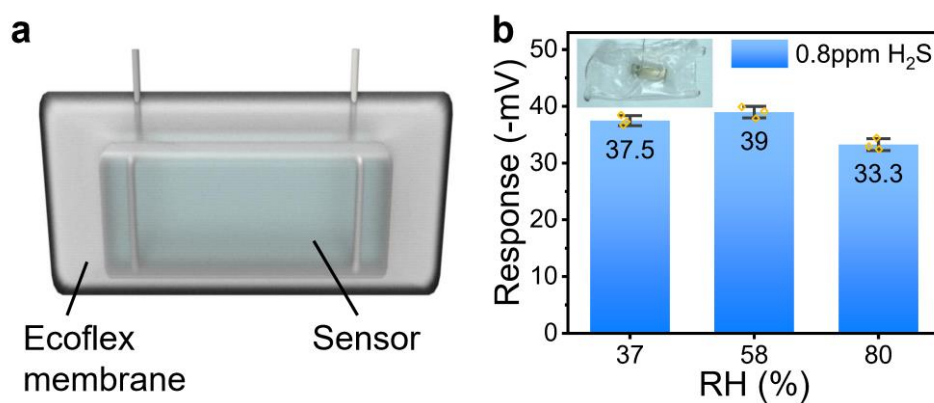

**Supplementary Figure 23. Elimination of humidity interference on response.** **a** Schematic diagram of Zn/Ag/DNO sensor with Ecoflex membrane encapsulation. **b** Response of the encapsulated sensor to 0.8 ppm H<sub>2</sub>S under varying RH conditions (37%, 58%, 80%). Inset is a physical picture of the Zn/Ag/DNO sensor with Ecoflex membrane encapsulation.  $n = 3$  for each group. The error bars denote standard deviations of the mean.

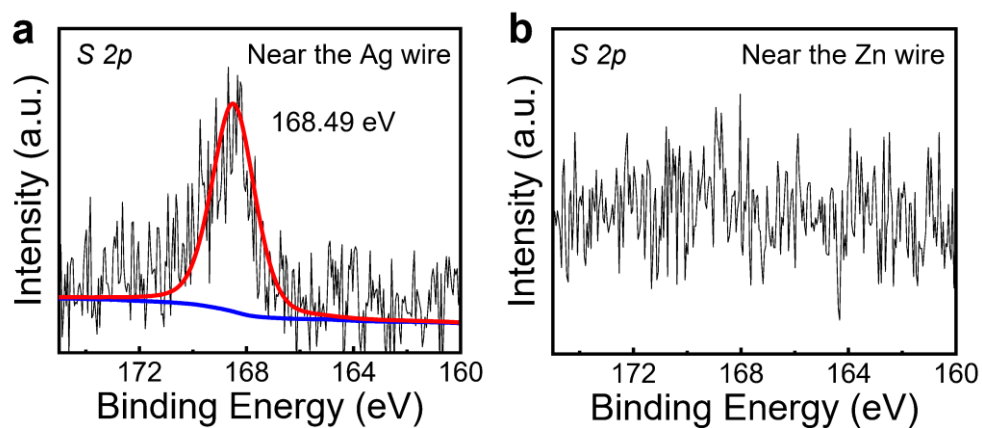

**Supplementary Figure 24. X-ray photoelectron spectroscopy (XPS) analysis of hydrogel sample close to the electrodes after 10 h exposure to 2 ppm  $\text{H}_2\text{S}$ , showing  $\text{S } 2p$  data. **a** hydrogel sample near the Ag electrode; **b** hydrogel sample near the Ag electrode.**

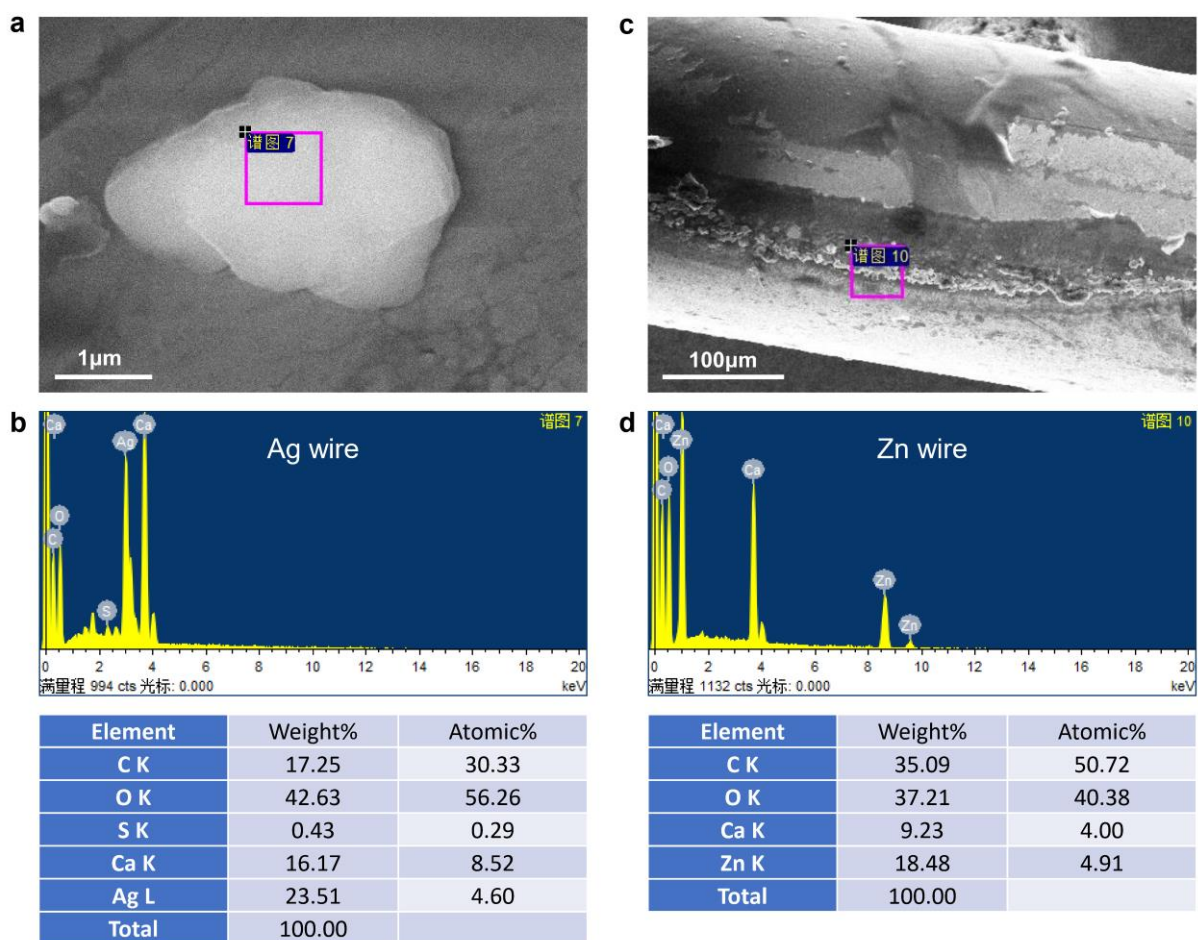

**Supplementary Figure 25. SEM images and Energy dispersive spectroscopy (EDS) element analysis of Ag and Zn wires from the device after exposure to H<sub>2</sub>S for 10 h. **a** SEM image of Ag wire; **b** EDS of Ag wire; **c** SEM image of Zn wire; **d** EDS of Zn wire. The experiment was repeated 3 times independently with similar results.**

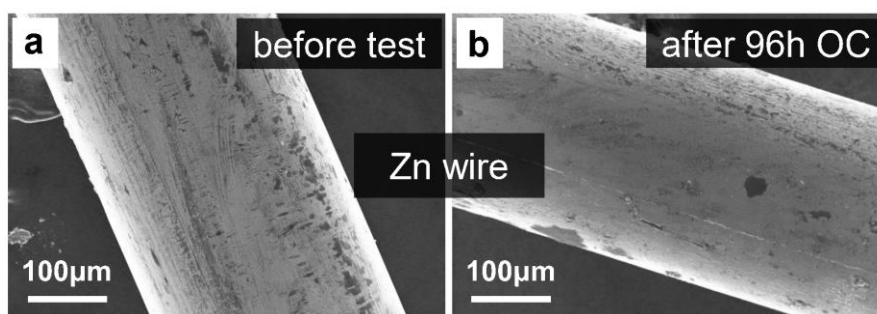

**Supplementary Figure 26. SEM images before and after keeping the Zn/Ag/DNO in open-circuit (OC) state for 96 h. a** Zn wire before test; **b** Zn wire after test. The experiment was repeated 3 times independently with similar results.

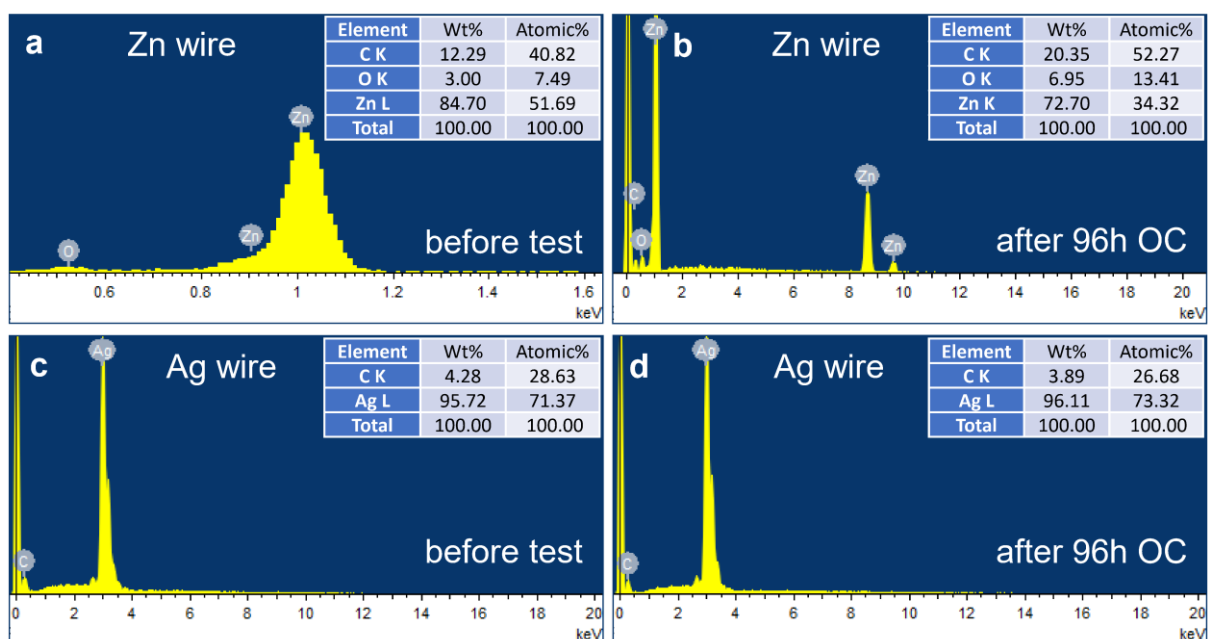

**Supplementary Figure 27. EDS element analysis before and after keeping the Zn/Ag/DNO in OC state for 96 h. a Zn wire before test; b Zn wire after test; c Ag wire before test; d Ag wire after test.**

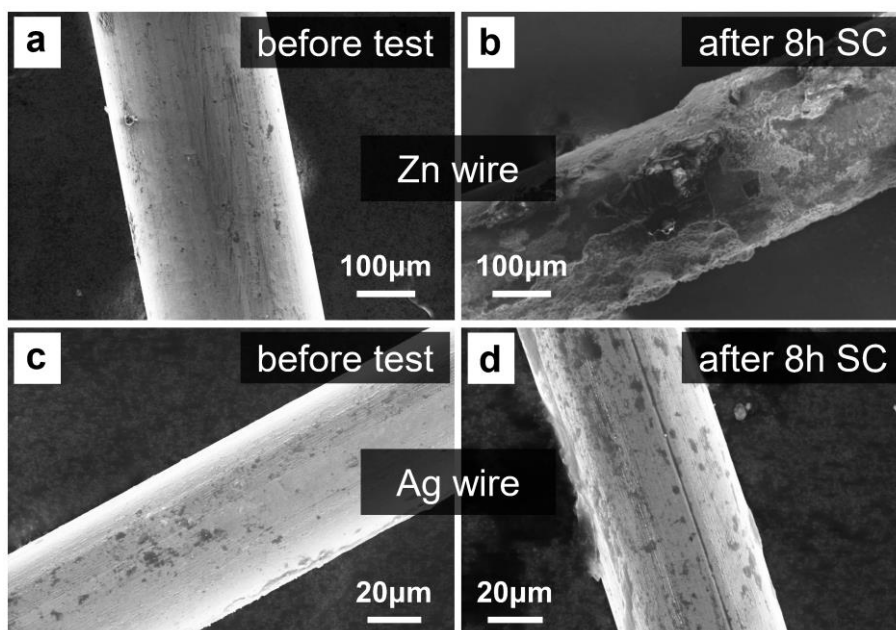

**Supplementary Figure 28. SEM images before and after keeping the Zn/Ag/DNO in short-circuit (SC) state for 8 h. a** Zn wire before test; **b** Zn wire after test; **c** Ag wire before test; **d** Ag wire after test. The experiment was repeated 3 times independently with similar results.

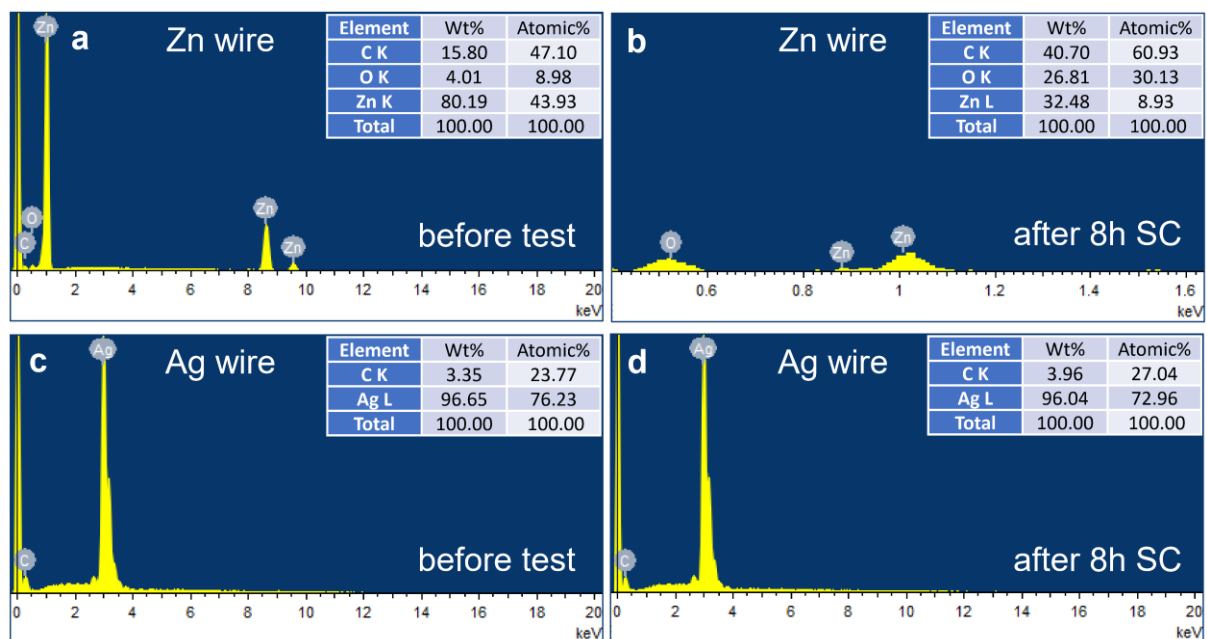

**Supplementary Figure 29. EDS element analysis before and after keeping the Zn/Ag/DNO in SC state for 8 h. a Zn wire before test; b Zn wire after test; c Ag wire before test; d Ag wire after test.**

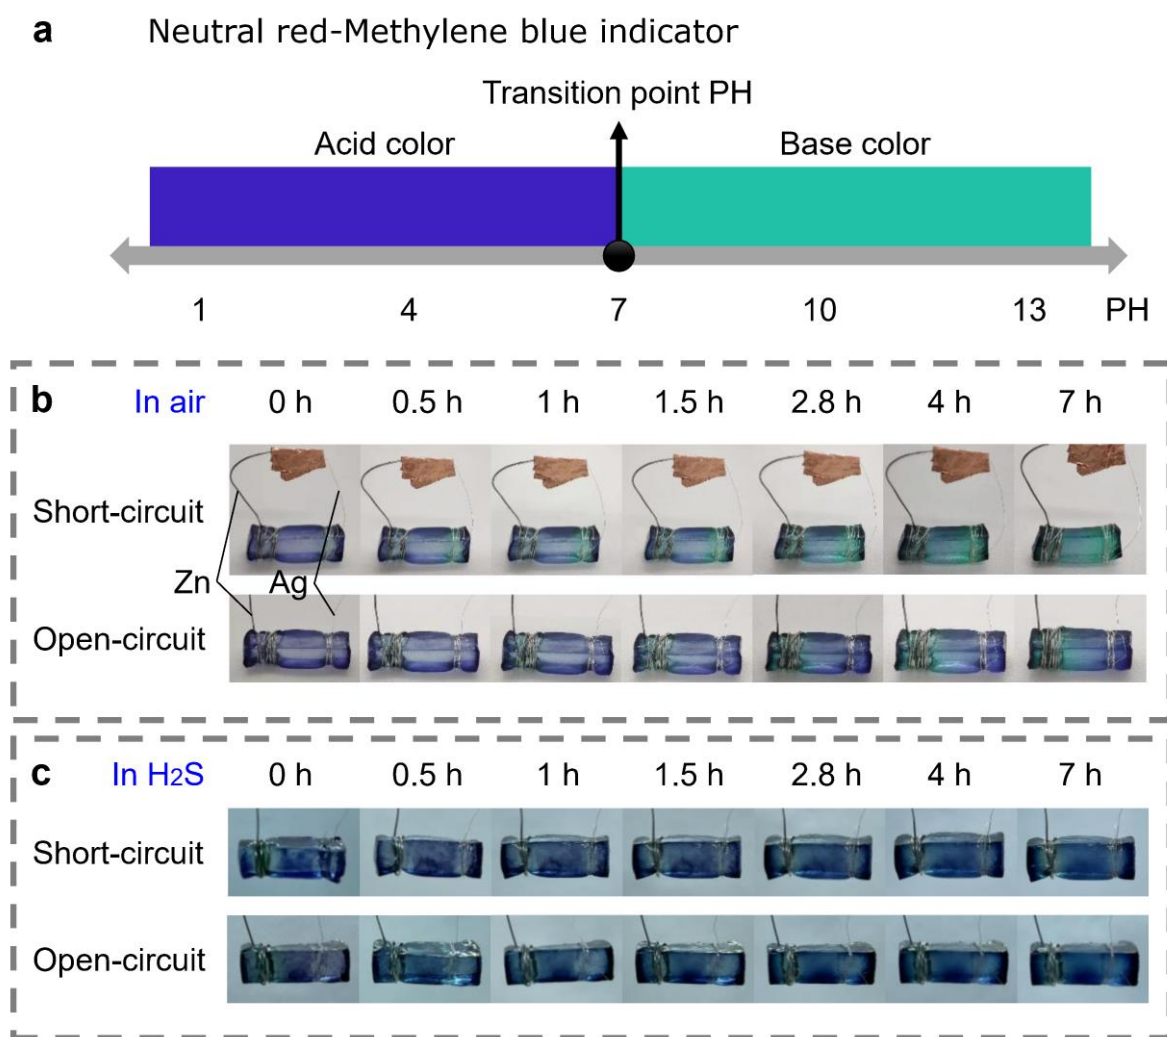

**Supplementary Figure 30. PH changes of hydrogels near Zn (left) and Ag (right) electrodes explored by Neutral red-Methylene blue indicator. a** The color of Neutral red-Methylene blue indicator corresponding to PH. **b-c** Photographs showing the color evolutions of Zn/Ag/DNHs after being stained with Neutral red-Methylene blue indicator and kept in SC state or OC state, in air (b) and H<sub>2</sub>S (1 ppm) atmospheres (c).



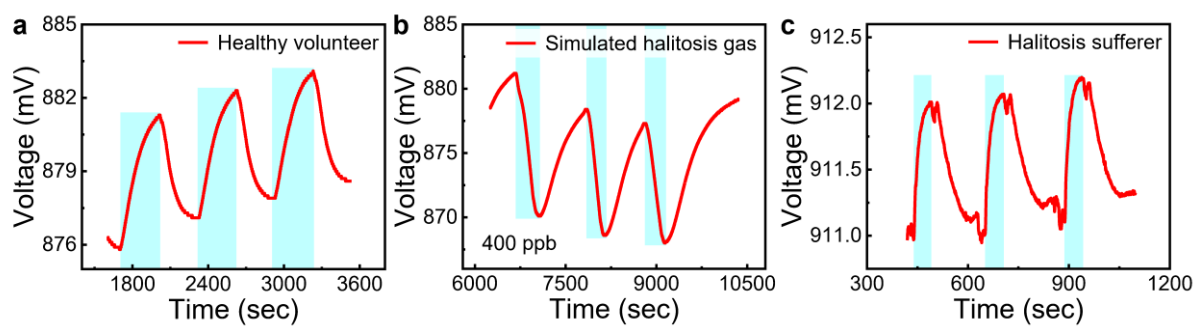

**Supplementary Figure 31. Dynamic responses of the Zn/Ag/DNO sensor to the exhaled breath of a healthy volunteer/halitosis sufferer and simulated halitosis gas: a** Exhaled breath of a healthy volunteer; **b** simulated halitosis gas; **c** Exhaled breath of a halitosis sufferer.

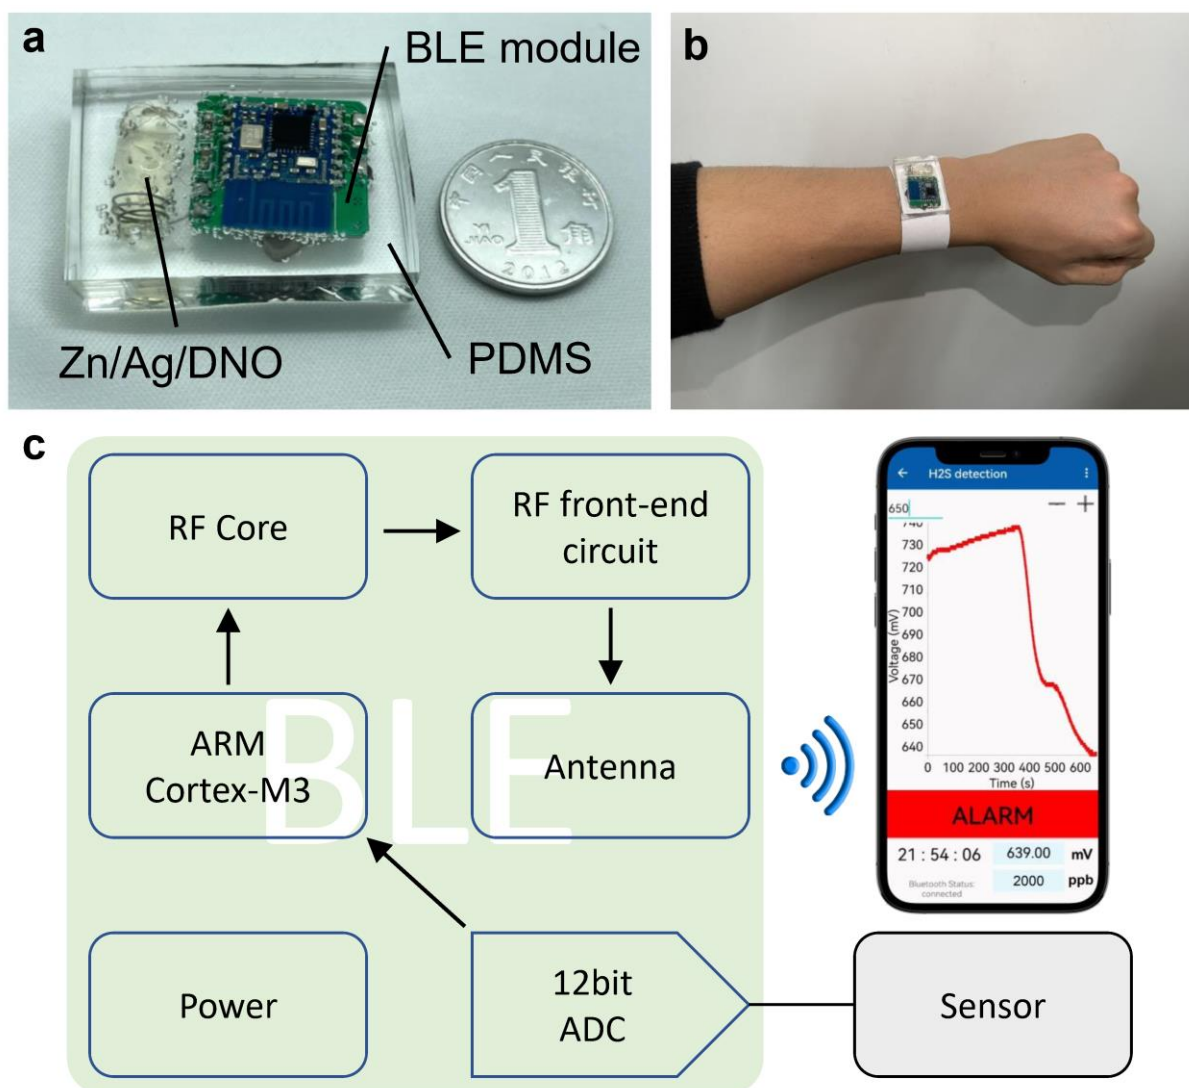

**Supplementary Figure 32. Real photographs and schematic of the wireless H<sub>2</sub>S sensing system.** **a** Close-up of the sensing device. The size of a coin is larger than that of the hydrogel sensor and slightly smaller than that of the whole wireless sensing system. **b** Wearable demonstration of the sensing device. **c** Configuration of the H<sub>2</sub>S sensing system consisted of a Zn/Ag/DNO sensor, a customized BLE module, and real-time monitoring App.

## Supplementary Tables

The LOD can be expressed as:

$$LOD = \frac{3RMS_{Noise}}{Slope} \quad (1)$$

where  $RMS_{Noise}$  is the root mean square deviation of the noise from the dynamic OCV curve and  $Slope$  is the sensitivity of the sensor here. As for the Zn/Ag/Gly1h-DNO, the sensitivity was experimentally measured to be 25.6 mV/ppm and the  $RMS_{Noise}$  was calculated to be 0.006214 mV according to the data in this table. Thus, the theoretical LOD is calculated as 0.73 ppb.

**Supplementary Table 1.** The 5<sup>th</sup> order polynomial fitting data used to calculate the LOD of the sensors at the baseline before exposure to H<sub>2</sub>S.

| Time (s) | V <sub>i</sub> -V | (V <sub>i</sub> -V) <sup>2</sup> |
|----------|-------------------|----------------------------------|
| 310      | -0.00376          | 1.41E-05                         |
| 320      | 5.43E-03          | 2.95E-05                         |
| 330      | -0.00653          | 4.26E-05                         |
| 340      | 0.00325           | 1.06E-05                         |
| 350      | 0.00719           | 5.17E-05                         |
| 360      | -0.00432          | 1.87E-05                         |
| 370      | -0.00332          | 1.1E-05                          |
| 380      | 0.00912           | 8.32E-05                         |
| 390      | 0.00846           | 7.16E-05                         |
| 400      | -0.00382          | 1.46E-05                         |

**Supplementary Table 2.** Comparison in the LOD, operating temperature, self-powered capacity, flexibility, maximal strain, and transparency of various H<sub>2</sub>S sensors.

| Sensing materials                                                         | LOD<br>(ppb) | Operating<br>temperature<br>(°C) | Self-<br>powered | Flexible | Maximal<br>Strain | Transparent |
|---------------------------------------------------------------------------|--------------|----------------------------------|------------------|----------|-------------------|-------------|
| <b>2D NbWO<sub>6</sub><sup>1</sup></b>                                    | 500          | 150                              | No               | No       | /                 | No          |
| <b>WO<sub>3</sub>-coated SnO<sub>2</sub><br/>nanowires<sup>2</sup></b>    | 100          | 200                              | No               | No       | /                 | No          |
| <b>TiO<sub>2</sub> thin films<sup>3</sup></b>                             | 100          | 100                              | No               | No       | /                 | No          |
| <b>CuO/In<sub>2</sub>O<sub>3</sub><sup>4</sup></b>                        | 200          | 70                               | No               | No       | /                 | No          |
| <b>2D MoO<sub>3</sub> nanoflakes<sup>5</sup></b>                          | 500          | 300                              | No               | No       | /                 | No          |
| <b>Cu-doped ZnO/RGO<br/>nanocomposites<sup>6</sup></b>                    | 136          | 24                               | No               | No       | /                 | No          |
| <b>nan-Fe<sub>2</sub>O<sub>3</sub><br/>nanoparticles<sup>7</sup></b>      | 50           | 300                              | No               | No       | /                 | No          |
| <b>SnO<sub>2</sub>/rGO/PANI<br/>ternary<br/>nanocomposite<sup>8</sup></b> | 50           | 25                               | No               | Yes      | 0%                | No          |
| <b>MOF-5/CS/IL<br/>membrane<sup>9</sup></b>                               | 1000         | 25                               | No               | Yes      | 0%                | No          |
| <b>Co<sub>2</sub>SnO<sub>4</sub>-SE<sup>10</sup></b>                      | 100          | 510                              | No               | No       | /                 | No          |
| <b>Mesoporous SnO<sub>2</sub><sup>11</sup></b>                            | 0.5          | 92                               | No               | No       | /                 | No          |
| <b>porous ZnFe<sub>2</sub>O<sub>4</sub><br/>nanosheets<sup>12</sup></b>   | 1000         | 85                               | No               | No       | /                 | No          |
| <b>Zn/Ag/DNO<sup>[This work]</sup></b>                                    | 0.73         | -10~40                           | Yes              | Yes      | 358%              | Yes         |

## Supplementary References

1. Wang, J. et al. Ultrathin 2D NbWO<sub>6</sub> Perovskite Semiconductor Based Gas Sensors with Ultrahigh Selectivity under Low Working Temperature. *Adv. Mater.* **34**, 2104958 (2022).
2. Hoa, T. T. N. et al. Highly selective H<sub>2</sub>S gas sensor based on WO<sub>3</sub>-coated SnO<sub>2</sub> nanowires. *Mater. Today Commun.* **26**, 102094 (2021).
3. Nagmani, Pravarthana, D., Tyagi, A., Jagadale, T. C., Prellier, W., Aswal, D. K. Highly sensitive and selective H<sub>2</sub>S gas sensor based on TiO<sub>2</sub> thin films. *Appl. Surf. Sci.* **549**, 149281 (2021).
4. Li, S. et al. Metal-Organic frameworks-derived bamboo-like CuO/In<sub>2</sub>O<sub>3</sub> Heterostructure for high-performance H<sub>2</sub>S gas sensor with Low operating temperature. *Sens. Actuators B* **310**, 127828 (2020).
5. Bao, J., Zhang, Z., Zheng, Y. H<sub>2</sub>S sensor based on two-dimensional MoO<sub>3</sub> nanoflakes: Transition between sulfidation and oxidation. *Sens. Actuators B* **345**, 130408 (2021).
6. Shewale, P. S., Yun, K.-S. Synthesis and characterization of Cu-doped ZnO/RGO nanocomposites for room-temperature H<sub>2</sub>S gas sensor. *J. Alloys Compd.* **837**, 155527 (2020).
7. Li, Z. et al. A fast response & recovery H<sub>2</sub>S gas sensor based on alpha-Fe<sub>2</sub>O<sub>3</sub> nanoparticles with ppb level detection limit. *J. Hazard. Mater.* **300**, 167-174 (2015).
8. Zhang, D., Wu, Z., Zong, X. Flexible and highly sensitive H<sub>2</sub>S gas sensor based on in-situ polymerized SnO<sub>2</sub>/rGO/PANI ternary nanocomposite with application in halitosis diagnosis. *Sens. Actuators B* **289**, 32-41 (2019).
9. Ali, A., Alzamly, A., Greish, Y. E., Bakiro, M., Nguyen, H. L., Mahmoud, S. T. A Highly Sensitive and Flexible Metal-Organic Framework Polymer-Based H<sub>2</sub>S Gas Sensor. *ACS Omega* **6**, 17690-17697 (2021).
10. Wang, C. et al. Mixed potential type H<sub>2</sub>S sensor based on stabilized zirconia and a Co<sub>2</sub>SnO<sub>4</sub> sensing electrode for halitosis monitoring. *Sens. Actuators B* **321**, 128587 (2020).
11. Song, B.-Y. et al. Highly selective ppb-level H<sub>2</sub>S sensor for spendable detection of exhaled biomarker and pork freshness at low temperature: Mesoporous SnO<sub>2</sub> hierarchical architectures derived from waste scallion root. *Sens. Actuators B* **307**, 127662 (2020).
12. Gao, X., Sun, Y., Zhu, C., Li, C., Ouyang, Q., Chen, Y. Highly sensitive and selective H<sub>2</sub>S sensor based on porous ZnFe<sub>2</sub>O<sub>4</sub> nanosheets. *Sens. Actuators B* **246**, 662-672 (2017).
